# Supplementary material for: Imaging extracellular ATP with a genetically-encoded, ratiometric fluorescent sensor
Source: PubMed Central journal article supplement (PMC5679667; doi:10.1371/journal.pone.0187481), 2017-11-09
Supplement: pone.0187481.s001.pdf [file pone.0187481.s001.pdf]

**Table S1.** Discussion of replicates.

| Figure                                                                                                                                                                                                                                                                                                                                                                                                                                                                                                                                                                                                                                                                                                                                                                                                                                                                                                                                                                                                                           | # Investigators          | n # replicates |
|----------------------------------------------------------------------------------------------------------------------------------------------------------------------------------------------------------------------------------------------------------------------------------------------------------------------------------------------------------------------------------------------------------------------------------------------------------------------------------------------------------------------------------------------------------------------------------------------------------------------------------------------------------------------------------------------------------------------------------------------------------------------------------------------------------------------------------------------------------------------------------------------------------------------------------------------------------------------------------------------------------------------------------|--------------------------|----------------|
| Figure 1                                                                                                                                                                                                                                                                                                                                                                                                                                                                                                                                                                                                                                                                                                                                                                                                                                                                                                                                                                                                                         | 1 - J.M.C.               | n=1            |
| <p>J.M.C. collected the data, and J.M.C. and M.T. analyzed the data.</p> <p>A single replicate is shown in Figure 1 because it is presented as a basic demonstration of the ecAT3.10 sensor response. 41 cells in total were analyzed and presented in Figure 1B-D. For Figure 1E, a subset of 10 cells, shown in Figure 1F, were analyzed.</p>                                                                                                                                                                                                                                                                                                                                                                                                                                                                                                                                                                                                                                                                                  |                          |                |
| Figure 2                                                                                                                                                                                                                                                                                                                                                                                                                                                                                                                                                                                                                                                                                                                                                                                                                                                                                                                                                                                                                         | 1 - J.M.C.               | n=3            |
| <p>J.M.C. collected, and J.M.C. and M.T. analyzed the data.</p> <p>Figure 2 is a representative replicate. Figure 2F summarizes data from 3 replicates in which 32 cells, 60 cells, and 46 cells were analyzed.</p>                                                                                                                                                                                                                                                                                                                                                                                                                                                                                                                                                                                                                                                                                                                                                                                                              |                          |                |
| Figure 3                                                                                                                                                                                                                                                                                                                                                                                                                                                                                                                                                                                                                                                                                                                                                                                                                                                                                                                                                                                                                         | 1 - J.M.C.               | n=5            |
| <p>J.M.C. collected and analyzed the data.</p> <p>Figure 2A is a representative replicate with 3 cells. Figure 2B summarizes data from 5 replicates in which 6 cells, 7 cells, 14 cells, 9 cells, and 3 cells, respectively were analyzed.</p>                                                                                                                                                                                                                                                                                                                                                                                                                                                                                                                                                                                                                                                                                                                                                                                   |                          |                |
| Figure 4                                                                                                                                                                                                                                                                                                                                                                                                                                                                                                                                                                                                                                                                                                                                                                                                                                                                                                                                                                                                                         | 3 - J.M.C., S.R., S.A.V. | var            |
| <p>J.M.C., S.R., and S.A.V. collected the data. J.M.C., S.R., S.A.V., and M.T. analyzed the data.</p> <p>In Figure 3A, 4-5 cells were analyzed per replicate, 6 replicates were carried out, and a total of 25 cells were analyzed for the vehicle condition. For the ARL67156 condition, 4-5 cells were analyzed per replicate, 6 replicates carried out, and a total of 25 cells were analyzed.</p> <p>In Figure 3B, 4 cells were analyzed per replicate, 6 replicates were carried out, and 24 cells total were analyzed for vehicle. For ARL67156, 4 cells were analyzed per replicate, 6 replicates were carried out, and a total of 24 cells were analyzed.</p> <p>Figure 3C, technical duplicates were performed for all protein assays. For the vehicle condition, data from 14 replicates were collected, and for the ARL67156 condition, data from 5 replicates were collected.</p>                                                                                                                                    |                          |                |
| Figure 5                                                                                                                                                                                                                                                                                                                                                                                                                                                                                                                                                                                                                                                                                                                                                                                                                                                                                                                                                                                                                         | 2 - S.R., S.A.V.         | n=3            |
| <p>S.R. and S.A.V. collected the data. S.R., S.A.V., and M.T. analyzed the data.</p> <p>In the vehicle condition in Figure 4A, data was collected from 3 replicates for the ecAT3.10 (42 cells, 32 cells, 33 cells) and 3 replicates for the ecATYEMK negative control (34 cells, 29 cells, 50 cells).</p> <p>In the ARL67157 condition in Figure 4B, data was collected from 3 replicates for the ecAT3.10-expressing cells (15 cells, 9 cells, 32 cells) and 3 replicates for the ecATYEMK negative control (15 cells, 32 cells, 29 cells).</p> <p>In the vehicle condition in Figure 4C, data was collected from 3 replicates for the ecAT3.10-expressing cells (23 cells, 29 cells, 36 cells) and 3 replicates for the ecATYEMK negative control (23 cells, 27 cells, 39 cells).</p> <p>In the ARL67157 condition in Figure 4D, data was collected from 3 replicates for the ecAT3.10-expressing cells (21 cells, 12 cells, 24 cells) and 3 replicates for the ecATYEMK negative control (21 cells, 30 cells, 39 cells).</p> |                          |                |
| Figure 6 + SI Fig. 7                                                                                                                                                                                                                                                                                                                                                                                                                                                                                                                                                                                                                                                                                                                                                                                                                                                                                                                                                                                                             | 1 - J.M.C.               | n=4            |
| <p>J.M.C. collected the data. J.M.C. and M.T. analyzed the data.</p> <p>In Figure 5A one replicate is shown, and data from 3 replicates were collected (6 cells, 6 cells, 6 cells).</p> <p>In Figure 5B-C one replicate is shown for the paired imaging and luciferase assays. Data from 4 replicates were collected and 4 cells per replicate were analyzed from the paired imaging data.</p>                                                                                                                                                                                                                                                                                                                                                                                                                                                                                                                                                                                                                                   |                          |                |
| Figure 7 + SI Fig. 8                                                                                                                                                                                                                                                                                                                                                                                                                                                                                                                                                                                                                                                                                                                                                                                                                                                                                                                                                                                                             | 2 - J.M.C., S.R., S.A.V. | n=6            |
| <p>J.M.C., S.R. and S.A.V. collected the data. J.M.C., S.R., S.A.V., and M.T. analyzed the data.</p> <p>In Figure 6A, data from 6 replicates were collected for each condition, with 4-5 cells analyzed per replicate. Unpaired, two-sided Student's t-test was used for comparisons.</p> <p>Supplemental Figure 6: Technical duplicates for all replicates. Vehicle and ARL67156 curves are from Figure 3. 3.3µM suramin, 3 replicates; 10µM suramin 3 replicates, 30µM suramin 7 replicates, 30µM PPADS 4 replicates, 30µM suramin + 30µM PPADS 5 replicates</p>                                                                                                                                                                                                                                                                                                                                                                                                                                                               |                          |                |
