# Supplementary material for: Imaging extracellular ATP with a genetically-encoded, ratiometric fluorescent sensor
Source: PubMed Central journal article supplement (PMC5679667; doi:10.1371/journal.pone.0187481), 2017-11-09
Supplement: pone.0187481.s002.pdf [file pone.0187481.s002.pdf]

789 **Table S2.** Figure 2B [ATP] dose-response data and fitting.

| Replicate 1         |                     | Replicate 2 |                     | Replicate 3 |                     | Replicate 4 |                     | Replicate 5 |                     |
|---------------------|---------------------|-------------|---------------------|-------------|---------------------|-------------|---------------------|-------------|---------------------|
| [ATP] (μM)          | F/F <sub>base</sub> | [ATP] (μM)  | F/F <sub>base</sub> | [ATP] (μM)  | F/F <sub>base</sub> | [ATP] (μM)  | F/F <sub>base</sub> | [ATP] (μM)  | F/F <sub>base</sub> |
| 0                   | 1.001±0.001         | 0           | 0.999±0.001         | 0           | 0.999±0.001         | 0           | 1.000±0.001         | 0           | 1.001±0.001         |
| 3                   | 1.012±0.003         | 4           | 1.067±0.004         | 1.37        | 1.032±0.003         | 0.3         | 1.010±0.002         | 0.457       | 1.025±0.005         |
| 30                  | 1.172±0.012         | 12          | 1.102±0.003         | 4.11        | 1.081±0.008         | 3           | 1.09±0.01           | 1.37        | 1.05±0.01           |
| 300                 | 1.30±0.02           | 37          | 1.21±0.02           | 12.3        | 1.18±0.02           | 30          | 1.20±0.02           | 4.11        | 1.10±0.02           |
|                     |                     | 111         | 1.27±0.02           | 37          | 1.26±0.02           | 300         | 1.24±0.03           | 12.3        | 1.16±0.02           |
|                     |                     | 333         | 1.29±0.02           | 111         | 1.28±0.02           |             |                     | 37          | 1.20±0.02           |
|                     |                     | 1000        | 1.29±0.02           | 333         | 1.27±0.02           |             |                     | 111         | 1.23±0.01           |
|                     |                     |             |                     |             |                     |             |                     | 333         | 1.22±0.01           |
|                     |                     |             |                     |             |                     |             |                     |             |                     |
| Hill Fit Parameters |                     |             |                     |             |                     |             |                     |             |                     |
| Min                 | n.d.                |             | 1.054±0.004         |             | 1.024±0.003         |             | 0.995±0.002         |             | 1.016±0.004         |
| Max                 | n.d.                |             | 1.29±0.02           |             | 1.28±0.02           |             | 1.25±0.03           |             | 1.228±0.009         |
| K (μM)              | n.d.                |             | 26±1                |             | 10. ±1              |             | 5.6±0.09            |             | 7±1                 |
| n                   | n.d.                |             | 1.7±0.1             |             | 1.80±0.08           |             | 0.96±0.04           |             | 1.10±0.04           |

\*F/F<sub>base</sub> is the fold-change over baseline, mean±sem.

\*\*n.d. not determined

\*\*\* Fitted parameters, mean±fitting error.

790  
791  
792  
793
