# Supplementary material for: Imaging extracellular ATP with a genetically-encoded, ratiometric fluorescent sensor
Source: PubMed Central journal article supplement (PMC5679667; doi:10.1371/journal.pone.0187481), 2017-11-09
Supplement: pone.0187481.s003.pdf [file pone.0187481.s003.pdf]

807 **Table S3.** Purified protein dose-response data and fitting.

| [ATP]<br>( $\mu$ M) | Vehicle           | 100 $\mu$ M<br>ARL67156 | 3.3 $\mu$ M<br>suramin | 10 $\mu$ M<br>suramin | 30 $\mu$ M<br>suramin | 30 $\mu$ M PPADS  | 30 $\mu$ M suramin<br>+30 $\mu$ MPPADS |
|---------------------|-------------------|-------------------------|------------------------|-----------------------|-----------------------|-------------------|----------------------------------------|
| 0                   | 0.86 $\pm$ 0.01   | 0.89 $\pm$ 0.01         | 0.813 $\pm$ 0.002      | 0.863 $\pm$ 0.003     | 0.94 $\pm$ 0.02       | 0.562 $\pm$ 0.006 | 0.78 $\pm$ 0.03                        |
| 0.02                | 0.88 $\pm$ 0.01   | 0.90 $\pm$ 0.01         | 0.828 $\pm$ 0.003      | 0.863 $\pm$ 0.008     | 0.94 $\pm$ 0.02       | 0.55 $\pm$ 0.01   | 0.77 $\pm$ 0.03                        |
| 0.05                | 0.91 $\pm$ 0.01   | 0.93 $\pm$ 0.02         | 0.847 $\pm$ 0.002      | 0.877 $\pm$ 0.005     | 0.93 $\pm$ 0.02       | 0.55 $\pm$ 0.01   | 0.76 $\pm$ 0.03                        |
| 0.14                | 0.97 $\pm$ 0.02   | 1.02 $\pm$ 0.03         | 0.917 $\pm$ 0.006      | 0.912 $\pm$ 0.004     | 0.94 $\pm$ 0.02       | 0.563 $\pm$ 0.005 | 0.77 $\pm$ 0.03                        |
| 0.41                | 1.16 $\pm$ 0.02   | 1.21 $\pm$ 0.05         | 1.091 $\pm$ 0.003      | 1.018 $\pm$ 0.003     | 0.97 $\pm$ 0.02       | 0.61 $\pm$ 0.02   | 0.78 $\pm$ 0.03                        |
| 1.2                 | 1.39 $\pm$ 0.01   | 1.43 $\pm$ 0.03         | 1.37 $\pm$ 0.02        | 1.252 $\pm$ 0.007     | 1.02 $\pm$ 0.02       | 0.71 $\pm$ 0.03   | 0.84 $\pm$ 0.04                        |
| 3.7                 | 1.508 $\pm$ 0.006 | 1.54 $\pm$ 0.02         | 1.49 $\pm$ 0.01        | 1.44 $\pm$ 0.02       | 1.12 $\pm$ 0.03       | 0.83 $\pm$ 0.03   | 0.95 $\pm$ 0.04                        |
| 11                  | 1.54 $\pm$ 0.01   | 1.57 $\pm$ 0.02         | 1.53 $\pm$ 0.01        | 1.50 $\pm$ 0.02       | 1.33 $\pm$ 0.02       | 0.91 $\pm$ 0.03   | 1.06 $\pm$ 0.04                        |
| 33                  | 1.55 $\pm$ 0.01   | 1.60 $\pm$ 0.03         | 1.52 $\pm$ 0.02        | 1.52 $\pm$ 0.02       | 1.39 $\pm$ 0.02       | 0.92 $\pm$ 0.04   | 1.10 $\pm$ 0.04                        |
| 100                 | 1.55 $\pm$ 0.01   | 1.58 $\pm$ 0.03         | 1.547 $\pm$ 0.008      | 1.52 $\pm$ 0.02       | 1.41 $\pm$ 0.01       | 0.94 $\pm$ 0.03   | 1.11 $\pm$ 0.04                        |
| 300                 | 1.52 $\pm$ 0.01   | 1.54 $\pm$ 0.03         | 1.539 $\pm$ 0.008      | 1.52 $\pm$ 0.01       | 1.419 $\pm$ 0.009     | 0.94 $\pm$ 0.03   | 1.11 $\pm$ 0.05                        |
| Hill Fit Parameters |                   |                         |                        |                       |                       |                   |                                        |
| Min                 | 0.88 $\pm$ 0.01   | 0.892 $\pm$ 0.006       | 0.83 $\pm$ 0.03        | 0.866 $\pm$ 0.005     | 0.92 $\pm$ 0.02       | 0.548 $\pm$ 0.08  | 0.76 $\pm$ 0.03                        |
| Max                 | 1.54 $\pm$ 0.01   | 1.58 $\pm$ 0.03         | 1.538 $\pm$ 0.006      | 1.52 $\pm$ 0.01       | 1.43 $\pm$ 0.01       | 0.94 $\pm$ 0.03   | 1.12 $\pm$ 0.05                        |
| K ( $\mu$ M)        | 0.52 $\pm$ 0.02   | 0.46 $\pm$ 0.07         | 0.576 $\pm$ 0.008      | 0.96 $\pm$ 0.02       | 3.5 $\pm$ 0.04        | 1.8 $\pm$ 0.3     | 4 $\pm$ 1                              |
| n                   | 1.44 $\pm$ 0.06   | 1.4 $\pm$ 0.1           | 1.45 $\pm$ 0.05        | 1.403 $\pm$ 0.008     | 1.33 $\pm$ 0.07       | 1.4 $\pm$ 0.2     | 1.5 $\pm$ 0.1                          |

\*Values are raw CFP/FRET ratios, mean $\pm$ sem.

\*\* Fitted parameters, mean $\pm$ fitting error.

808  
809  
810
