# Supplementary material for: Imaging extracellular ATP with a genetically-encoded, ratiometric fluorescent sensor
Source: PubMed Central journal article supplement (PMC5679667; doi:10.1371/journal.pone.0187481), 2017-11-09
Supplement: pone.0187481.s004.pdf [file pone.0187481.s004.pdf]

845 **Table S4.** Summary of peak responses shown in Fig 6B.

|             | Vehicle     | ARL67156    | Suramin     | ARL+Suramin |
|-------------|-------------|-------------|-------------|-------------|
| Replicate 1 | 1.058±0.002 | 1.16±0.03   | 1.026±0.003 | 1.042±0.003 |
| Replicate 2 | 1.042±0.004 | 1.12±0.02   | 1.018±0.003 | 1.038±0.001 |
| Replicate 3 | 1.025±0.002 | 1.111±0.006 | 1.023±0.004 | 1.053±0.008 |
| Replicate 4 | 1.05±0.01   | 1.07±0.01   | 1.026±0.003 | 1.027±0.006 |
| Replicate 5 | 1.08±0.01   | 1.13±0.01   | 1.033±0.006 | 1.060±0.008 |
| Replicate 6 | 1.10±0.01   | 1.17±0.05   | 1.033±0.004 | 1.07±0.01   |

846 \*Peak fold-change over baseline, mean±sem.

847

848
