# Supplementary material for: Imaging extracellular ATP with a genetically-encoded, ratiometric fluorescent sensor
Source: PubMed Central journal article supplement (PMC5679667; doi:10.1371/journal.pone.0187481), 2017-11-09

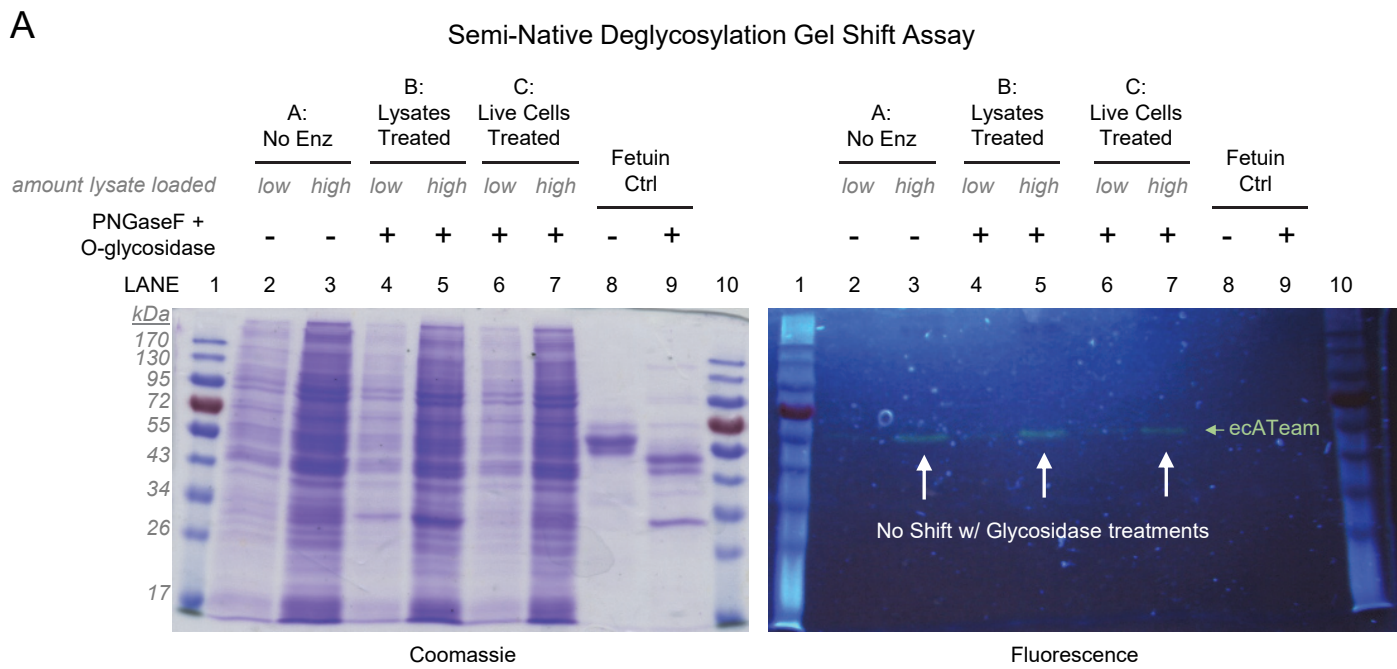

**B** ATP Dose-Response  
w/ PNGaseF + O-glycosidase + Neuramidase Pre-Treatment

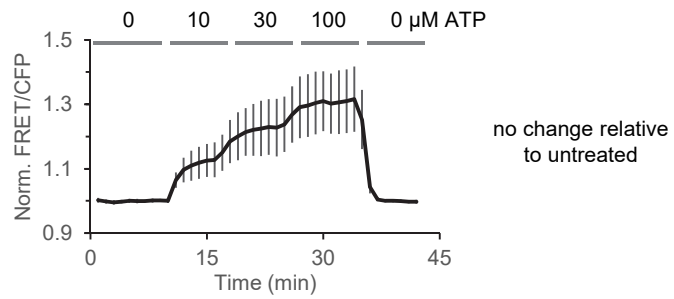

Supplement: pone.0187481.s007.pdf [file pone.0187481.s007.pdf]
